# Supplementary material for: Zika Virus Infects Intermediate Progenitor Cells and Post-mitotic Committed Neurons in Human Fetal Brain Tissues
Source: PubMed Central journal article supplement (PMC5665882; doi:10.1038/s41598-017-13980-2), 2017-11-01
Supplement: 41598_2017_13980_MOESM1_ESM.pdf [file 41598_2017_13980_MOESM1_ESM.pdf]

## SUPPLEMENTAL INFORMATION

### **Zika Virus Infects Intermediate Progenitor Cells and Post-mitotic Committed Neurons in Human Fetal Brain Tissues**

Ming-Yi Lin, Yi-Ling Wang, Wan-Lin Wu, Victoria Wolseley, Ming-Ting Tsai, Vladimir Radic, Matthew E. Thornton, Brendan H. Grubbs, Robert H. Chow, I-Chueh Huang

| Donor | Age (GW) | Antibodies used in this work                                             |
|-------|----------|--------------------------------------------------------------------------|
| 1     | 14.1     | Flavivirus E protein (millipore, MAB10216, mouse monoclonal, 1:500)      |
| 2     | 14.4     | ZIKV E protein (GeneTex, GTX634155, mouse monoclonal IgG2b, 1:200)       |
| 3     | 15.2     | Ki-67 (ThermoFisher, PA5-19462, rabbit polyclonal, 1:500)                |
| 4     | 15.5     | SOX2 (Abcam, ab110145, goat polyclonal, 1:100)                           |
| 5     | 15.6     | NESTIN (millipore, ab5922, rabbit polyclonal, 1:200)                     |
| 6     | 16.2     | TBR2 (millipore, ab15894, chicken polyclonal, 1:200)                     |
| 7     | 16.6     | TBR2 (millipore, ab2283, rabbit polyclonal, 1:300)                       |
| 8     | 17.1     | TBR2 (millipore, MA5-24291, mouse monoclonal, 1:200)                     |
| 9     | 17.2     | SATB2 (Santa Cruz Biotechnology, sc-81376, mouse monoclonal IgG1, 1:250) |
| 10    | 17.3     | MAP2 (ThermoFisher, PA1-10005, chicken polyclonal, 1:1000)               |
| 11    | 17.5     | GFAP (Abcam, ab7260, rabbit polyclonal, 1:400)                           |
| 12    | 17.6     | NG2 (millipore, ab5320, rabbit polyclonal, 1:25)                         |
| 13    | 17.6     | IBA1 (WAKO, 019-19741, rabbit polyclonal, 1:250)                         |
| 14    | 18.5     | CD11b (Abcam, ab8878, rat monoclonal, 1:200)                             |
| 15    | 18.5     | HLA-DR (Abcam, ab134038, rat monoclonal, 1:200)                          |
| 16    | 19       | Cleaved Caspase-3 (Cell Signaling, 9661, rabbit polyclonal, 1:100)       |
| 17    | 19       |                                                                          |
| 18    | 21       |                                                                          |

**Extended Data Table 1. Human fetal brain tissues analyzed in our research.** Gestational ages of donors and antibodies used for image studies were listed.

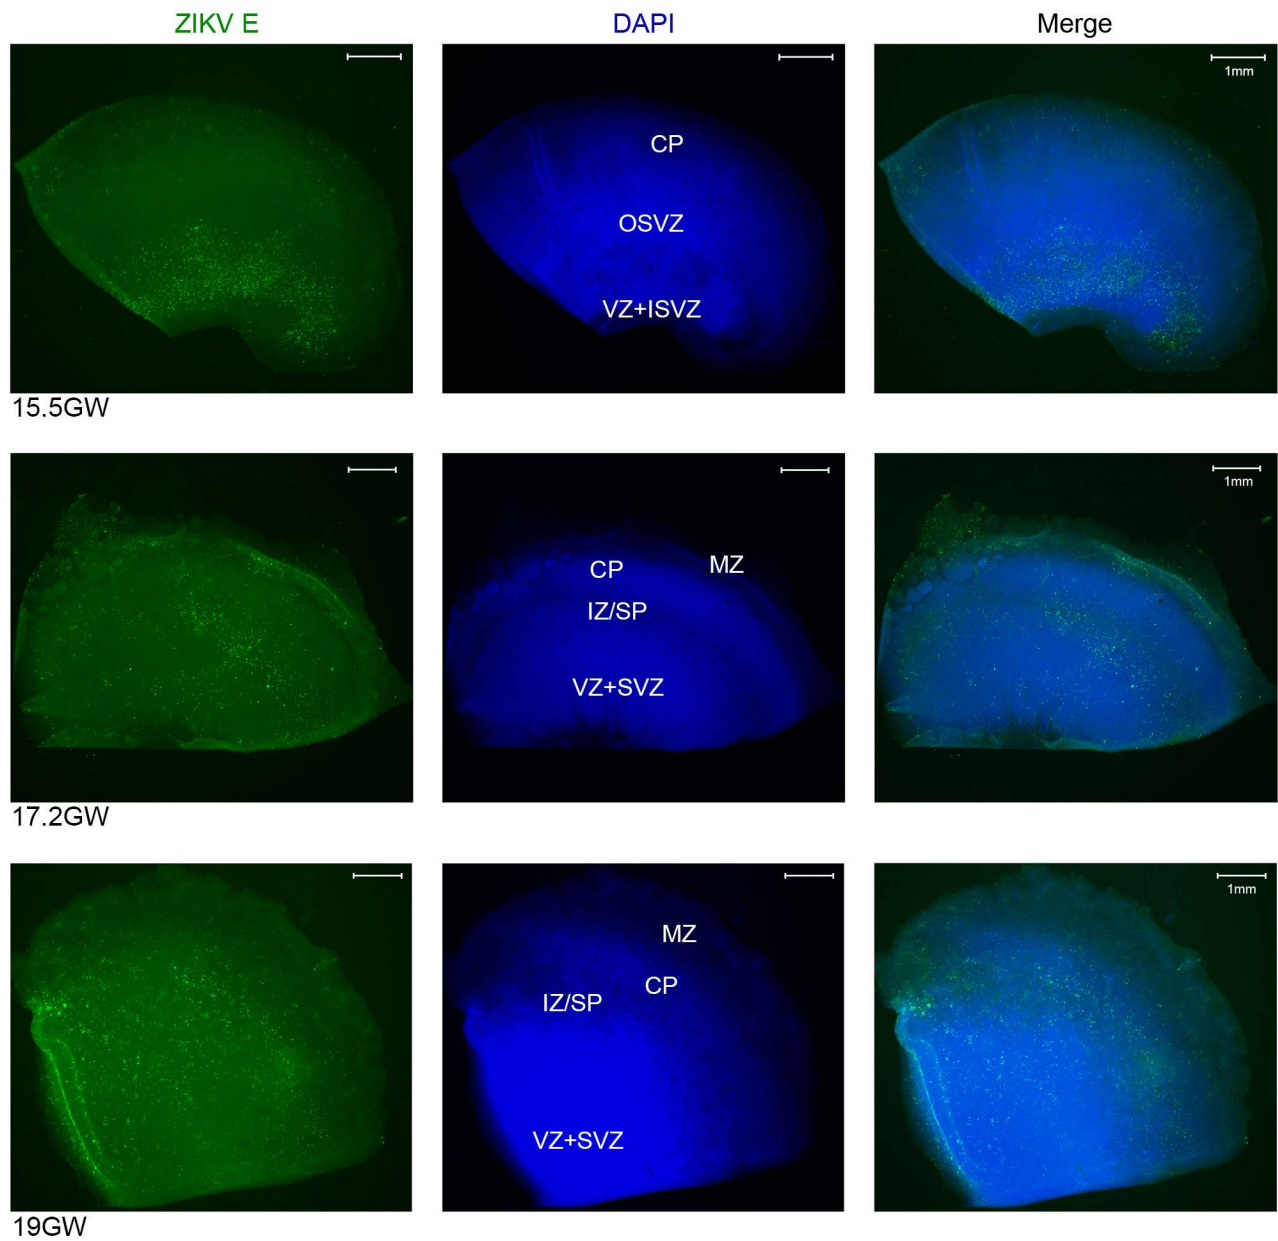

**Extended Data Figure 1 | ZIKV infection in human fetal brain tissue slices.** Experiments similar to those in Fig. 1a except that merged and single-color images of Fig. 1a are shown. (VZ: ventricular zone, ISVZ: inner subventricular zone, OSVZ: outer subventricular zone, IZ: intermediate zone, SP: subplate, CP: cortical plate, MZ: marginal zone.)

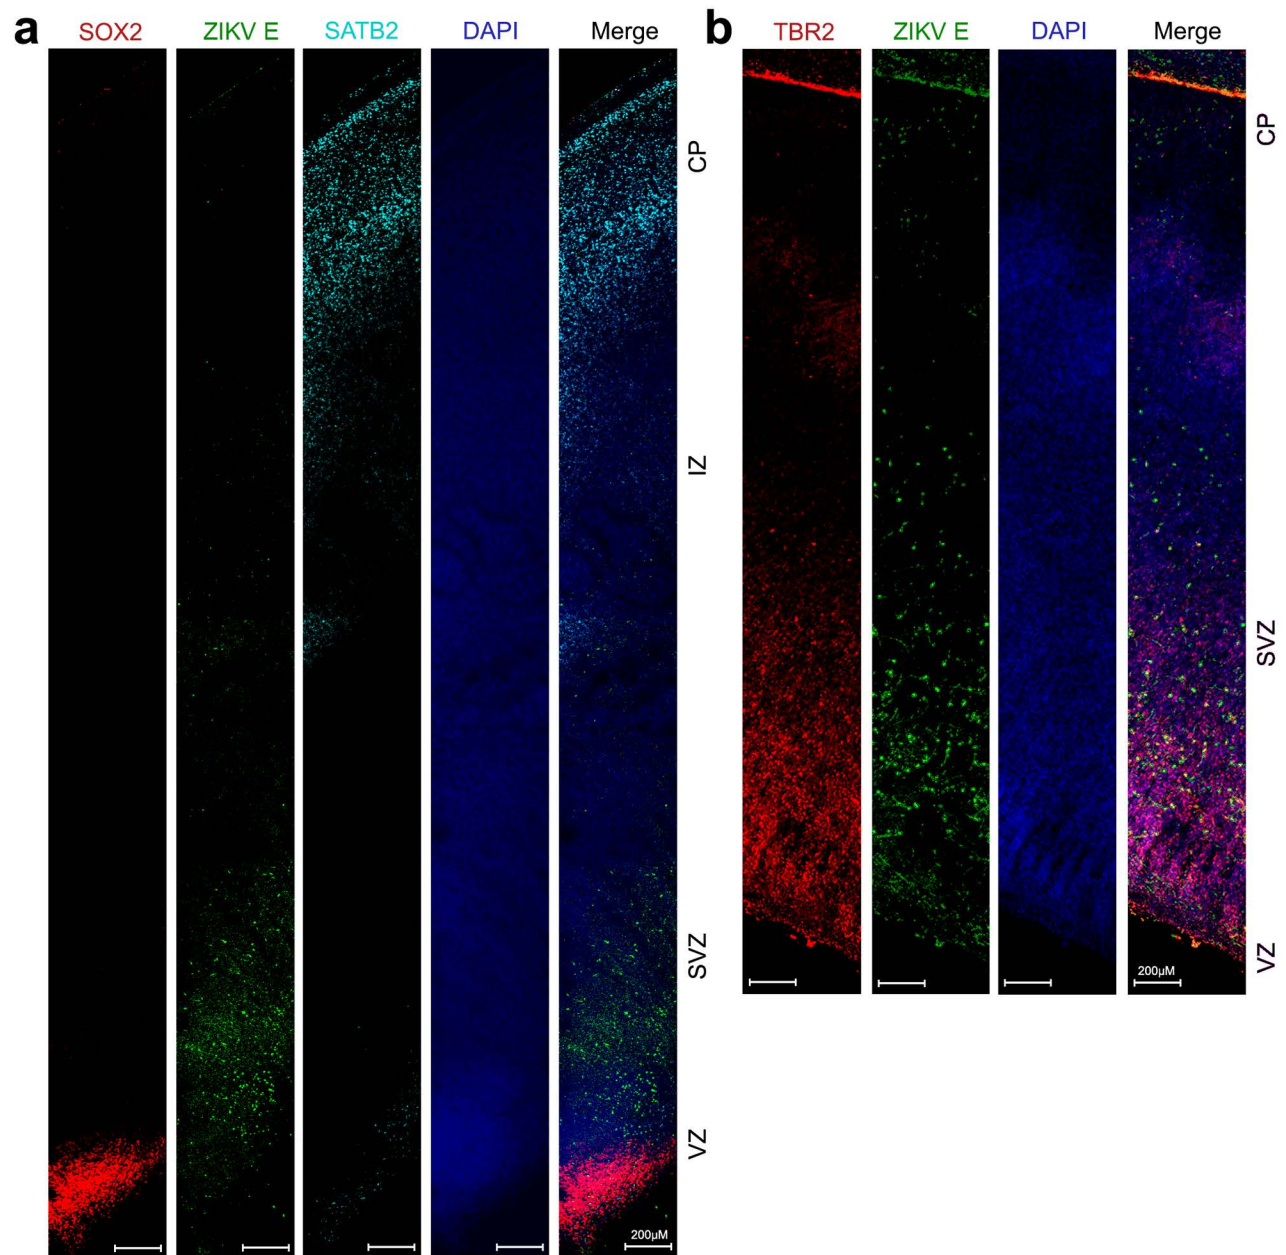

**Extended Data Figure 2 | ZIKV infection in human fetal brain tissue slices. a, b,** Human fetal brain tissues from donors at the indicated gestation ages were infected with  $1 \times 10^6$  PFU of ZIKV strain MR766. Two days later, infected tissues were labeled with the indicated antibodies and imaged by confocal microscopy. (VZ: ventricular zone, SVZ: subventricular zone, IZ: intermediate zone, CP: cortical plate.)

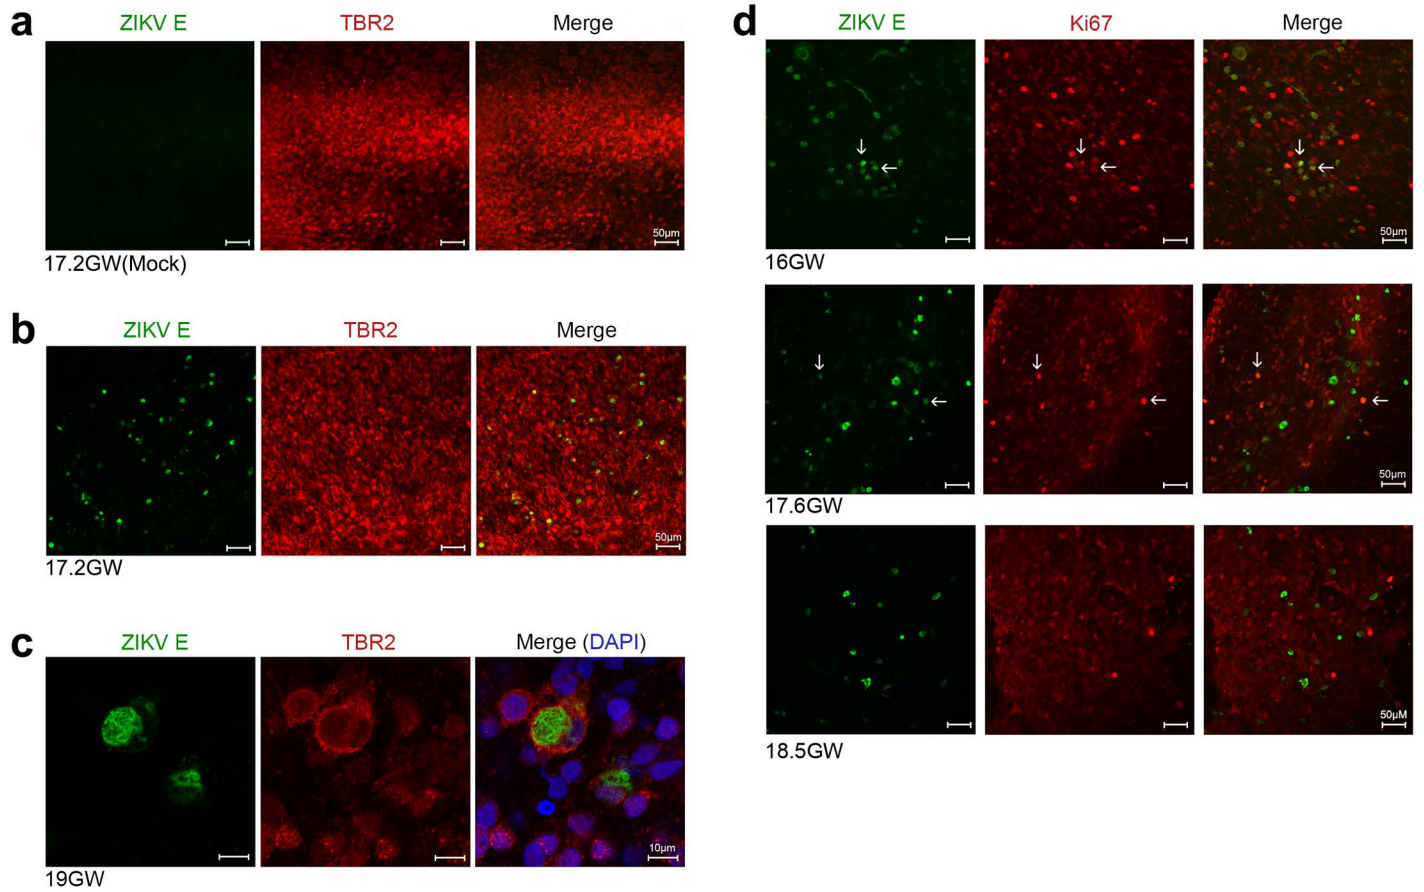

**Extended Data Figure 3 | ZIKV infects IPCs.** **a, b**, Experiments were similar to those in Fig. 1b except that images of uninfected controls (a) and representative images used for quantitative analysis in Fig. 1d (b) are shown. **c**, Single-color and merged x-y axis images of Fig. 1c are shown. **d**, Human fetal brain tissues from donors at the indicated gestation ages were infected with  $1 \times 10^6$  PFU of ZIKV strain MR766. Two days later, infected tissues were labeled with the indicated antibodies. Labeled cells were imaged by confocal microscopy. Arrows indicate ZIKV-infected Ki67-positive cells.

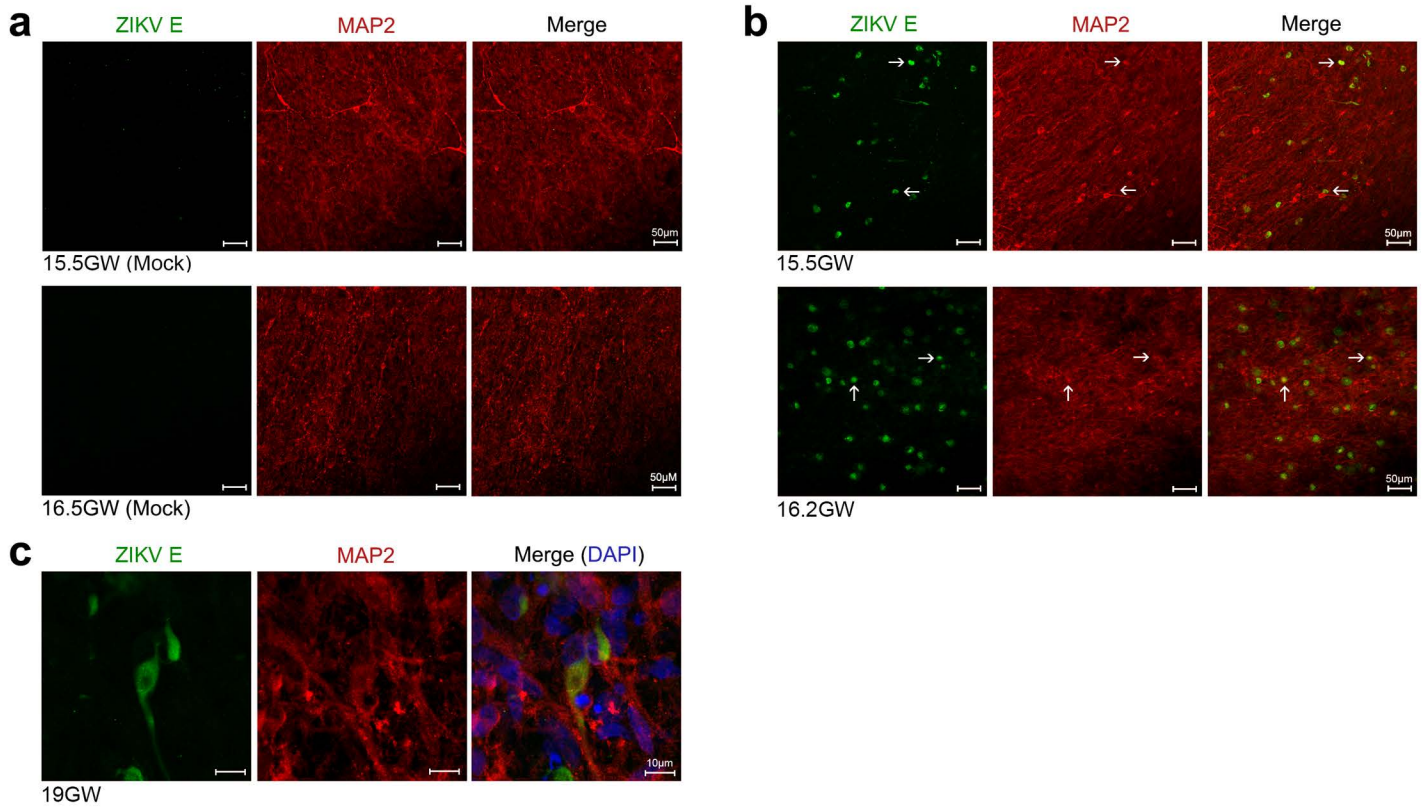

**Extended Data Figure 4 | ZIKV infects post-mitotic committed neurons.** **a, b**, Experiments were similar to those in Fig. 1e except that images of uninfected controls (**a**) and representative images used for quantitative analysis in Fig. 1g (**b**) are shown. Arrows indicate ZIKV-infected MAP2-positive cells. **c**, Single-color and merged x-y axis images of Fig. 1f are shown.

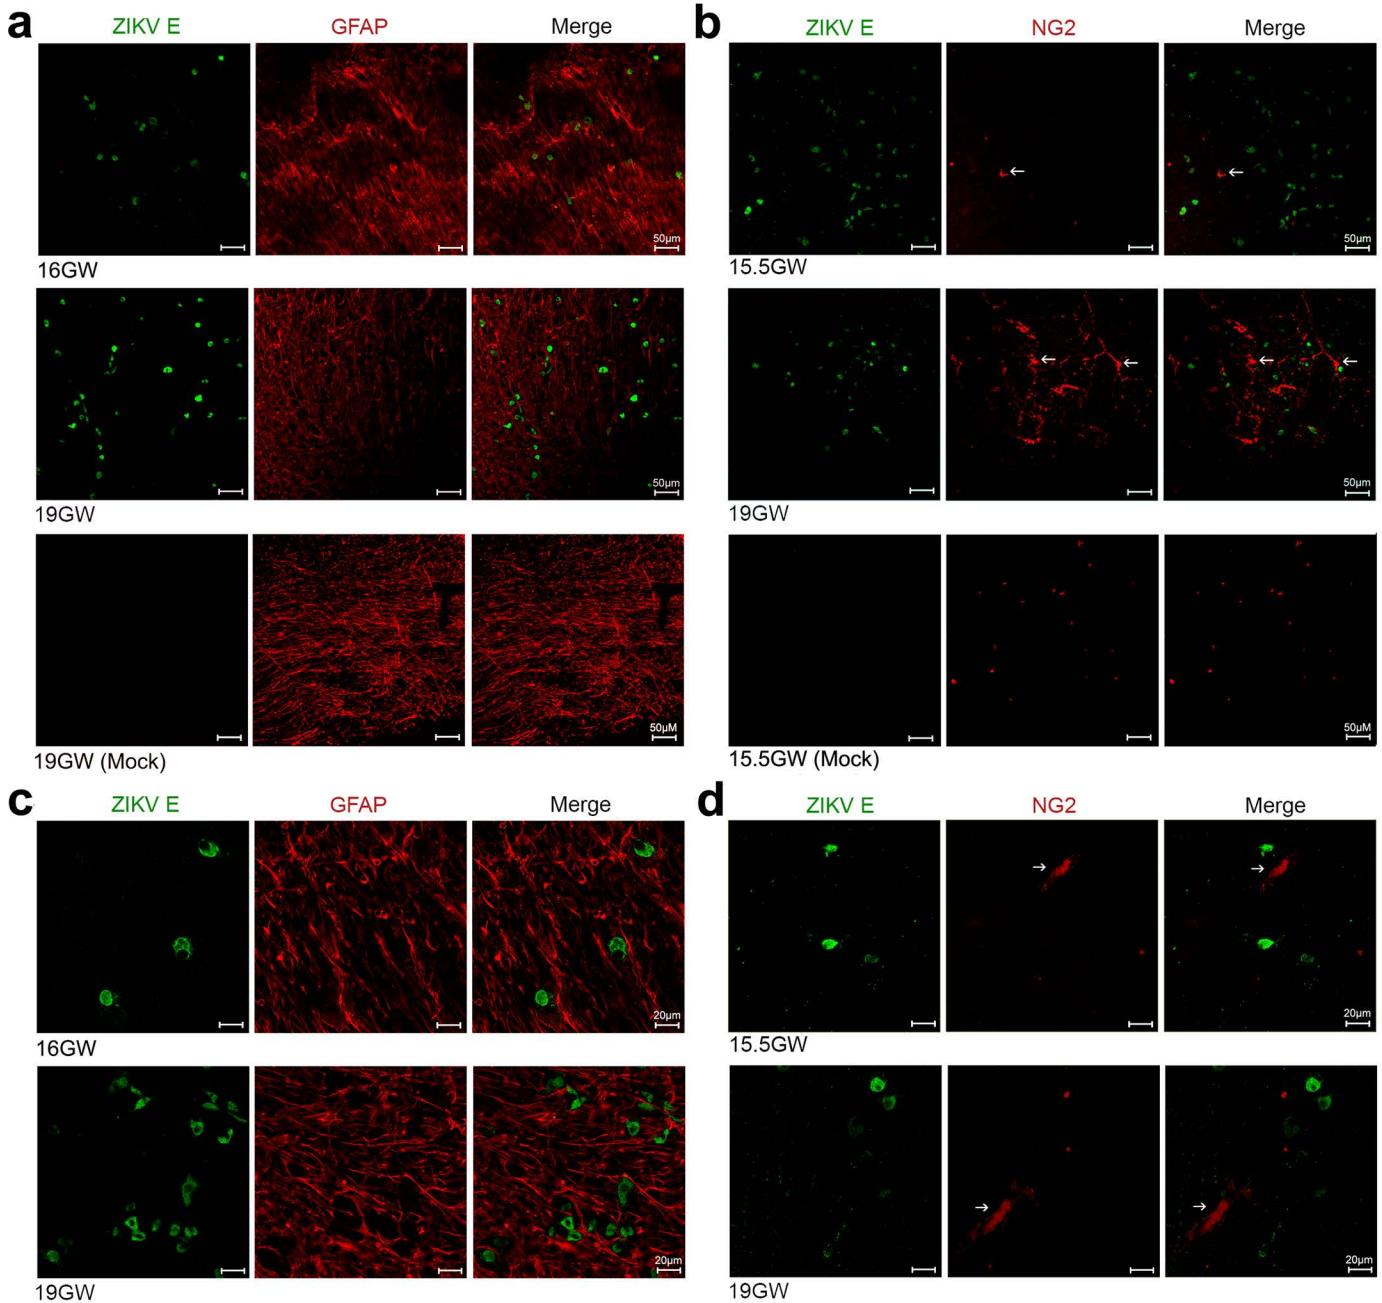

**Extended Data Figure 5 | GFAP- and NG2-positive cells are not major target cells for ZIKV.** **a, b**, Human fetal brain tissues from donors at the indicated gestation ages were mock infected or infected with  $1 \times 10^6$  PFU of ZIKV strain MR766. Two days later, tissues were labeled with the indicated antibodies. Labeled cells were imaged by confocal microscopy. **c, d**, Experiments were similar to those in (a) and (b) except that high magnification images are shown. Arrows indicate oligodendroglial cells. 10-20 fields and more than 300 ZIKV-infected cells for each brain slice were inspected to draw our conclusions. Markers used included GFAP for neural stem cells or astroglial cells and NG2 for oligodendroglial cells.

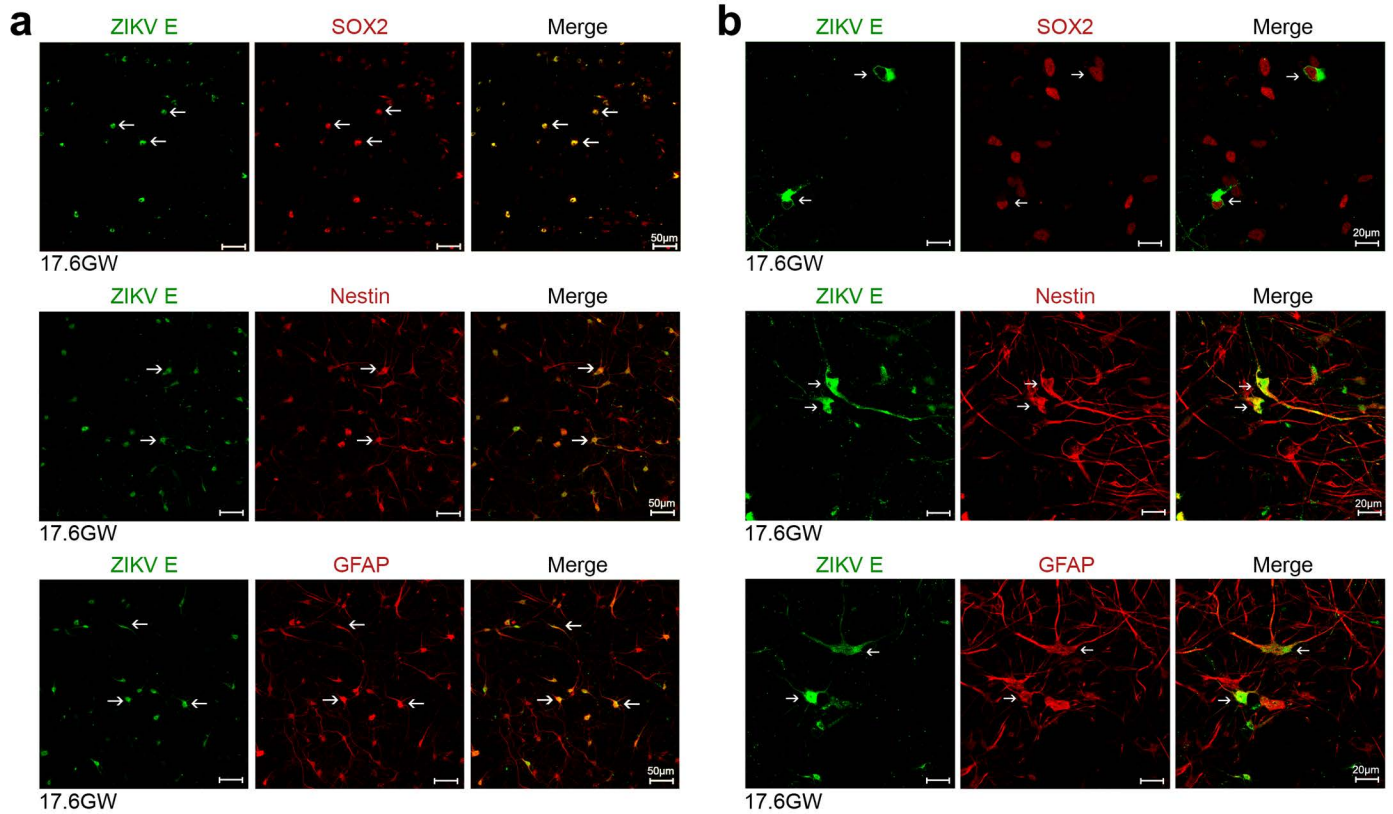

**Extended Data Figure 6 | ZIKV infects neural stem cells in monolayer cultures derived from human fetal brain tissues.** **a**, Brain monolayer derived from human fetal brain tissues from donors at the indicated gestation ages were infected with  $1 \times 10^6$  PFU of ZIKV strain MR766. Two days later, infected cells were labeled with the indicated antibodies. Labeled cells were imaged by confocal microscopy. **b**, Experiments were similar to those in (a) except that high magnification images are shown. Arrows indicate ZIKV-infected cells. Markers used included SOX2 and nestin for neural stem cells, and GFAP for neural stem cells or astroglial cells.

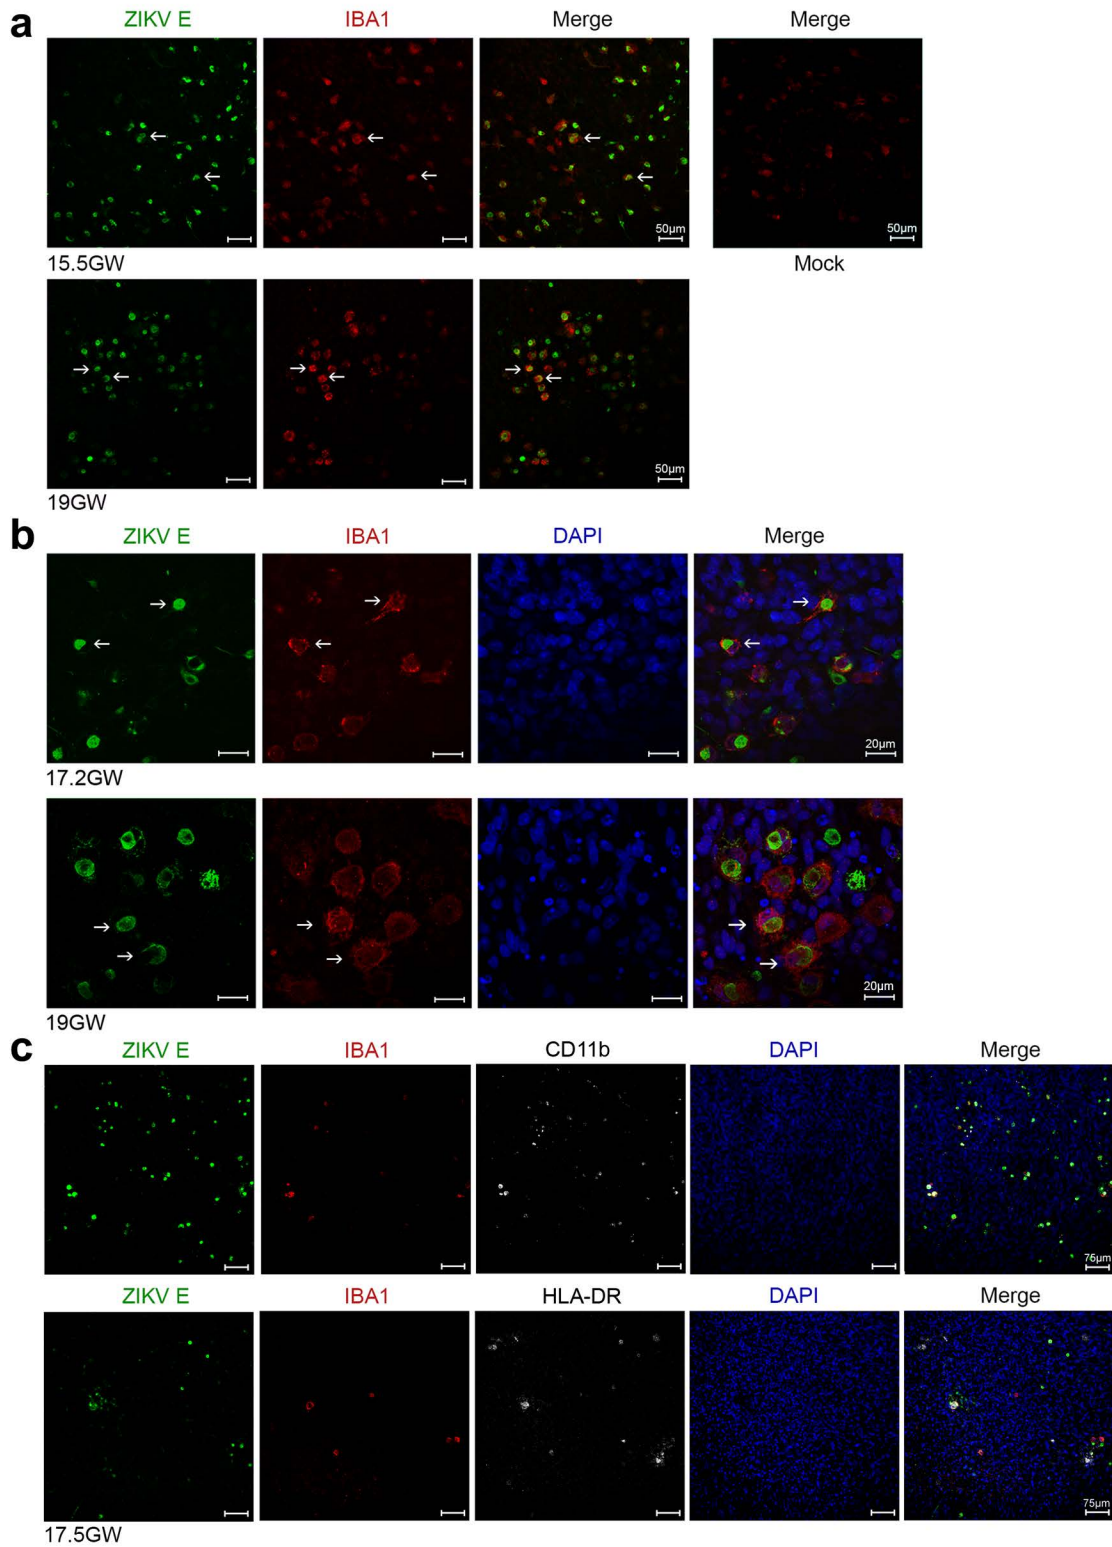

**Extended Data Figure 7 | ZIKV infection activates microglial cells.** a-c, Human fetal brain tissues from donors at the indicated gestation ages were infected with  $1 \times 10^6$  PFU ZIKV strain MR766. Two days later, infected tissues were labeled with the indicated antibodies. Labeled cells were imaged by confocal microscopy.



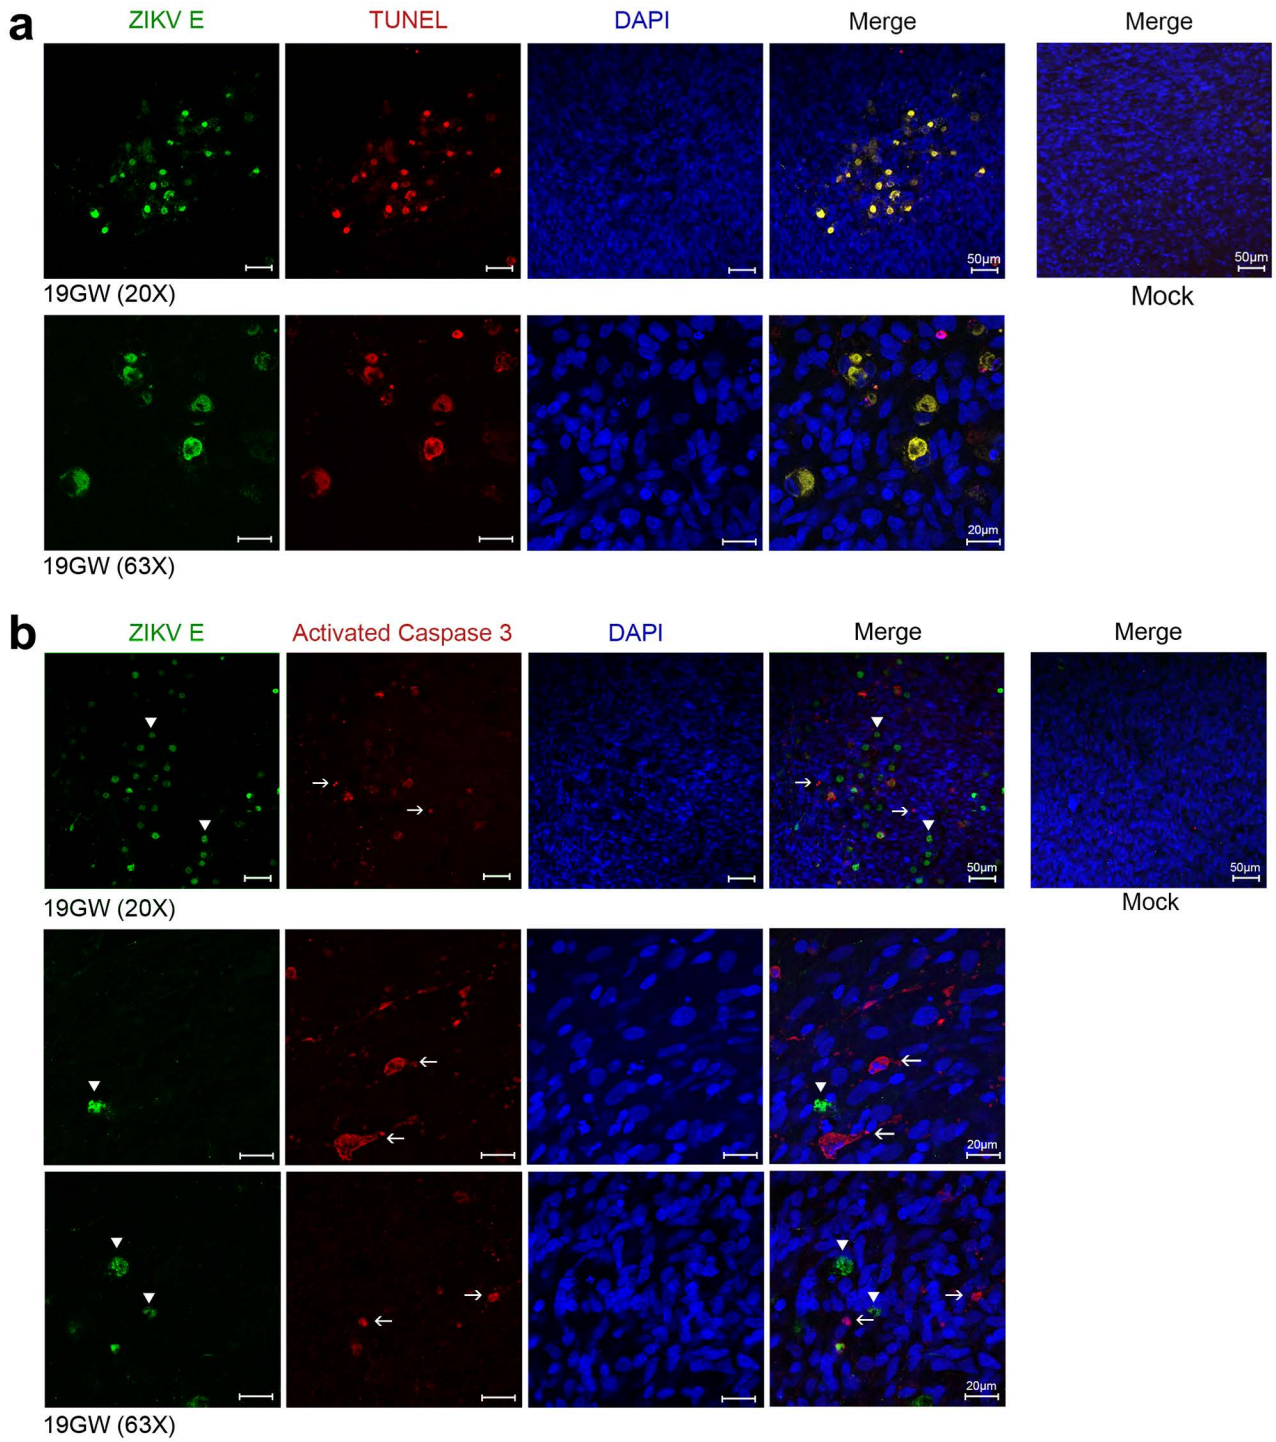

**Extended Data Figure 8 | ZIKV infection induces DNA fragmentation and apoptosis in cells.** **a**, Experiments were similar to those in Fig. 3c except additional lower magnification images and single-color images of Fig. 3c are shown. **b**, Experiments were similar to those in Fig. 3d except additional lower and higher magnification images and single-color images of Fig. 3d are shown. Arrowheads indicate ZIKV-infected cells and arrows indicate uninfected cells.

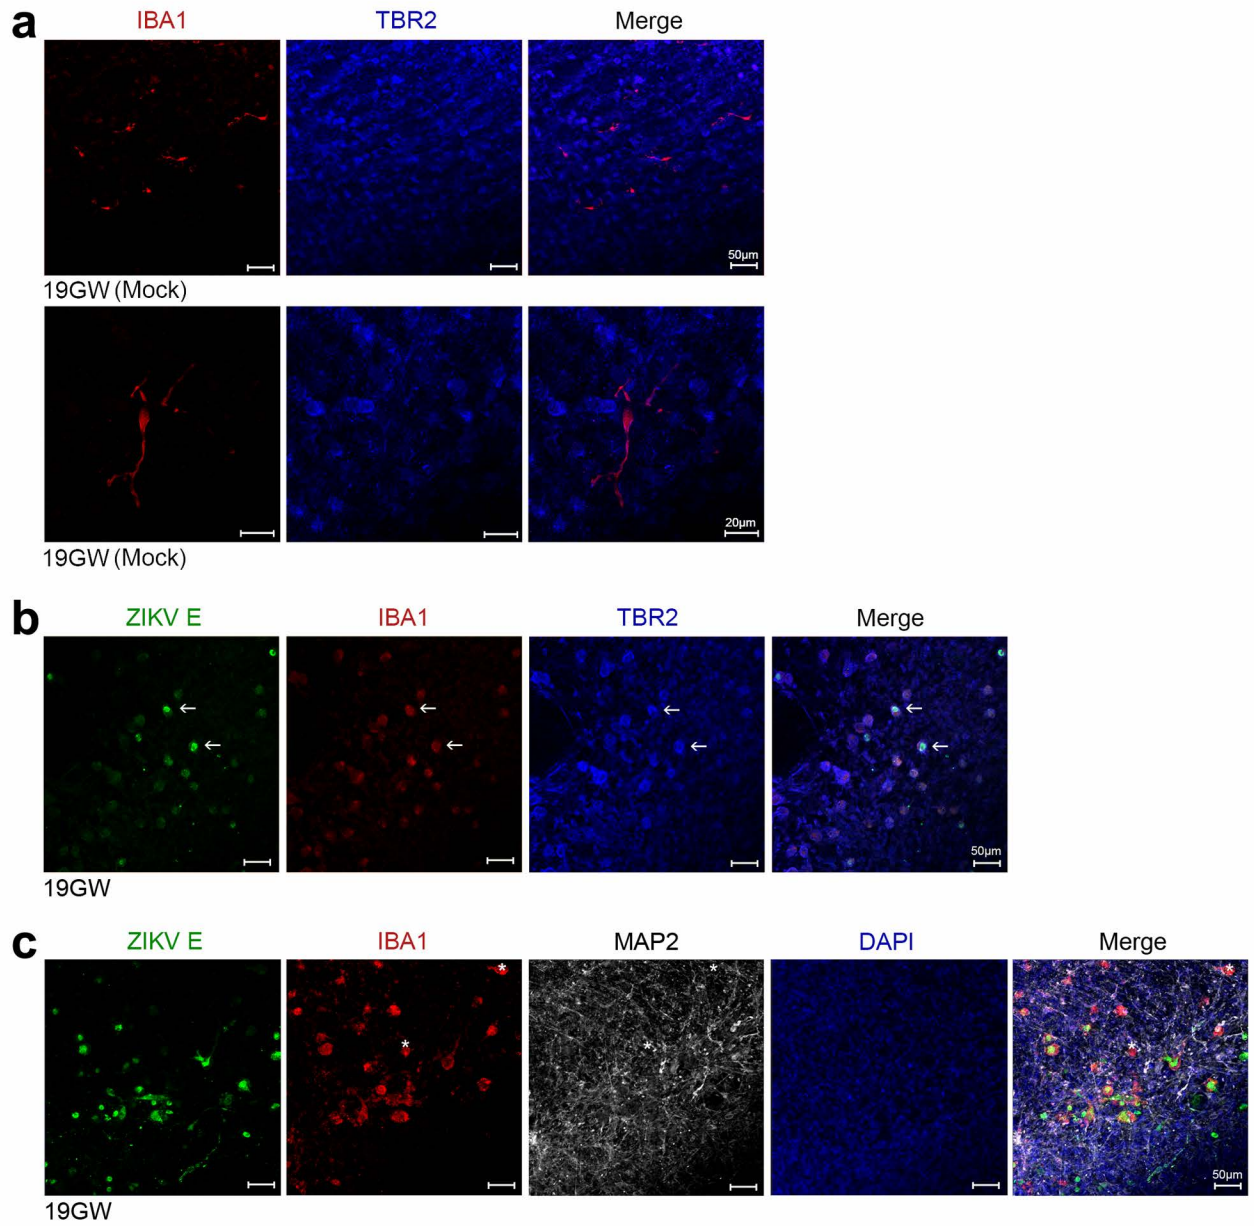

**Extended Data Figure 9 | ZIKV infection activates microglial cells.** **a**, Human fetal brain tissues from donors at the indicated gestation ages were labeled with the indicated antibodies. There was no cross-reaction between Tbr2 and Iba1 antibodies used in our studies. **b**, Experiments were similar to those in Fig. 3e except that lower magnification images are shown. Arrows indicate colocalization of Tbr2 and Iba1 in ZIKV-infected cells. **c**, Experiments were similar to those in Fig. 3f except that lower magnification images are shown. \* indicates Iba1-positive but MAP2-negative cells.
